# Supplementary material for: Complementary Strategies to Unlock Biosynthesis Gene Clusters Encoding Secondary Metabolites in the Filamentous Fungus Podospora anserina
Source: MDPI journal article supplement (doi:10.3390/jof9010009), 2022-12-21
Supplement: s1 [file s1]

**A**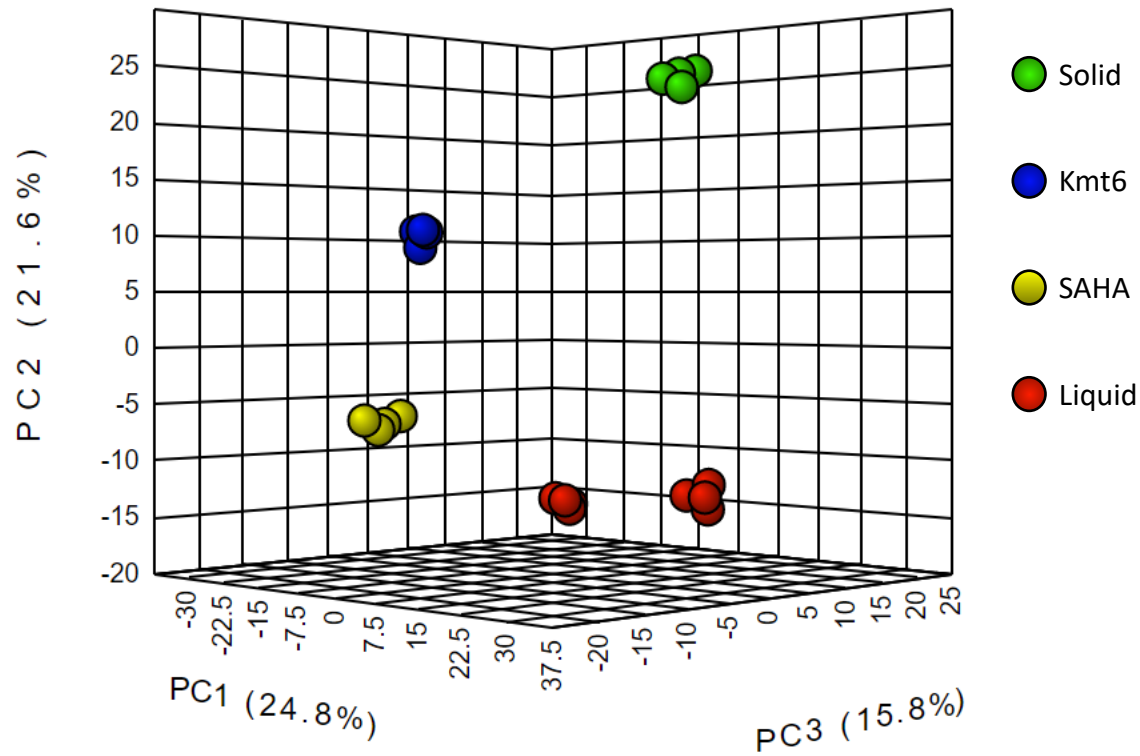**B**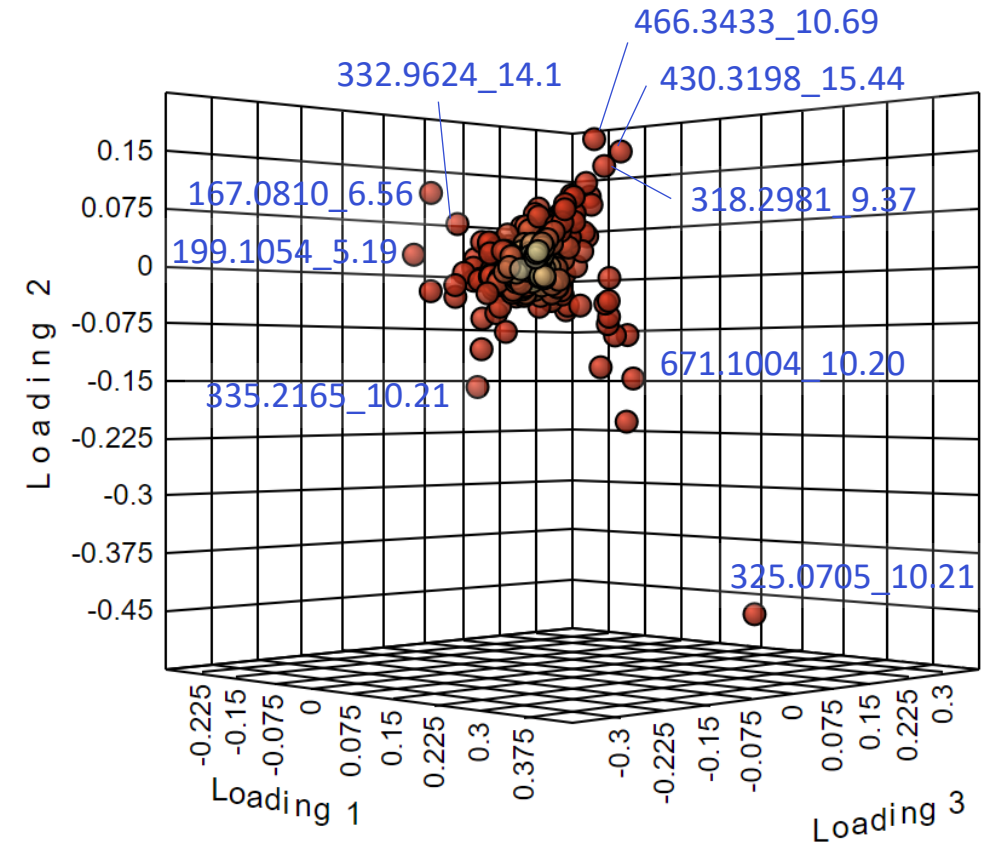

Figure S1. Multivariate study of the *P. anserina* WT strain in relation to four different conditions. “Liquid”: M2 liquid medium inoculated with WT; “Solid”: M2 solid medium inoculated with WT; “SAHA”: M2 liquid medium supplemented with 100  $\mu$ M SAHA and inoculated with WT; “Kmt6”: M2 liquid medium inoculated with the Kmt6 mutant strain. Principal component analysis (PCA) 3D-score plot (A) figuring PC1 vs PC2 vs PC3 on the complete data set (Pareto scaling) and loadings plot (B) representing the variability of the samples (with 24.8% of variance explained on PC1 and 21.6% on PC2) and the weight of the different variables, respectively. Some features with important coefficient in the PCA are shown in blue. All the experiments were performed in quadruplicates, except for the condition “Liquid” for which 8 replicates were done.

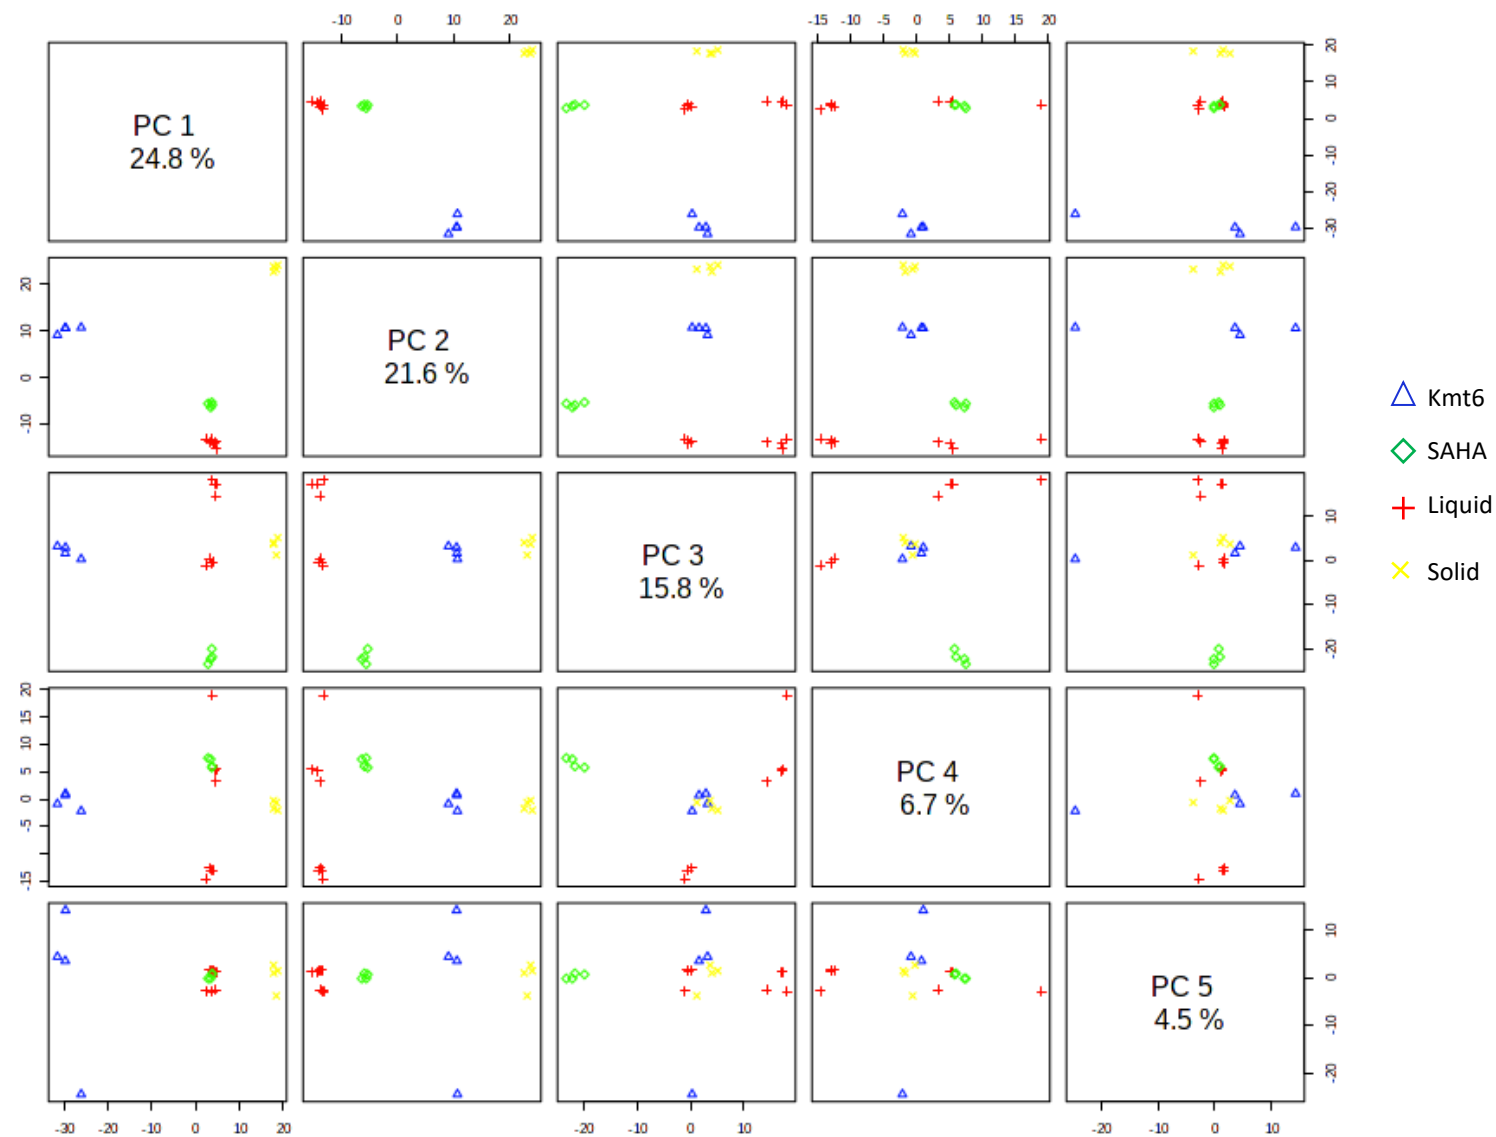

Figure S2. Overview of the principal component analysis of the normalised and Pareto-scaled matrix illustrating the 5 first principal components, which account for 73.6% of total variance.

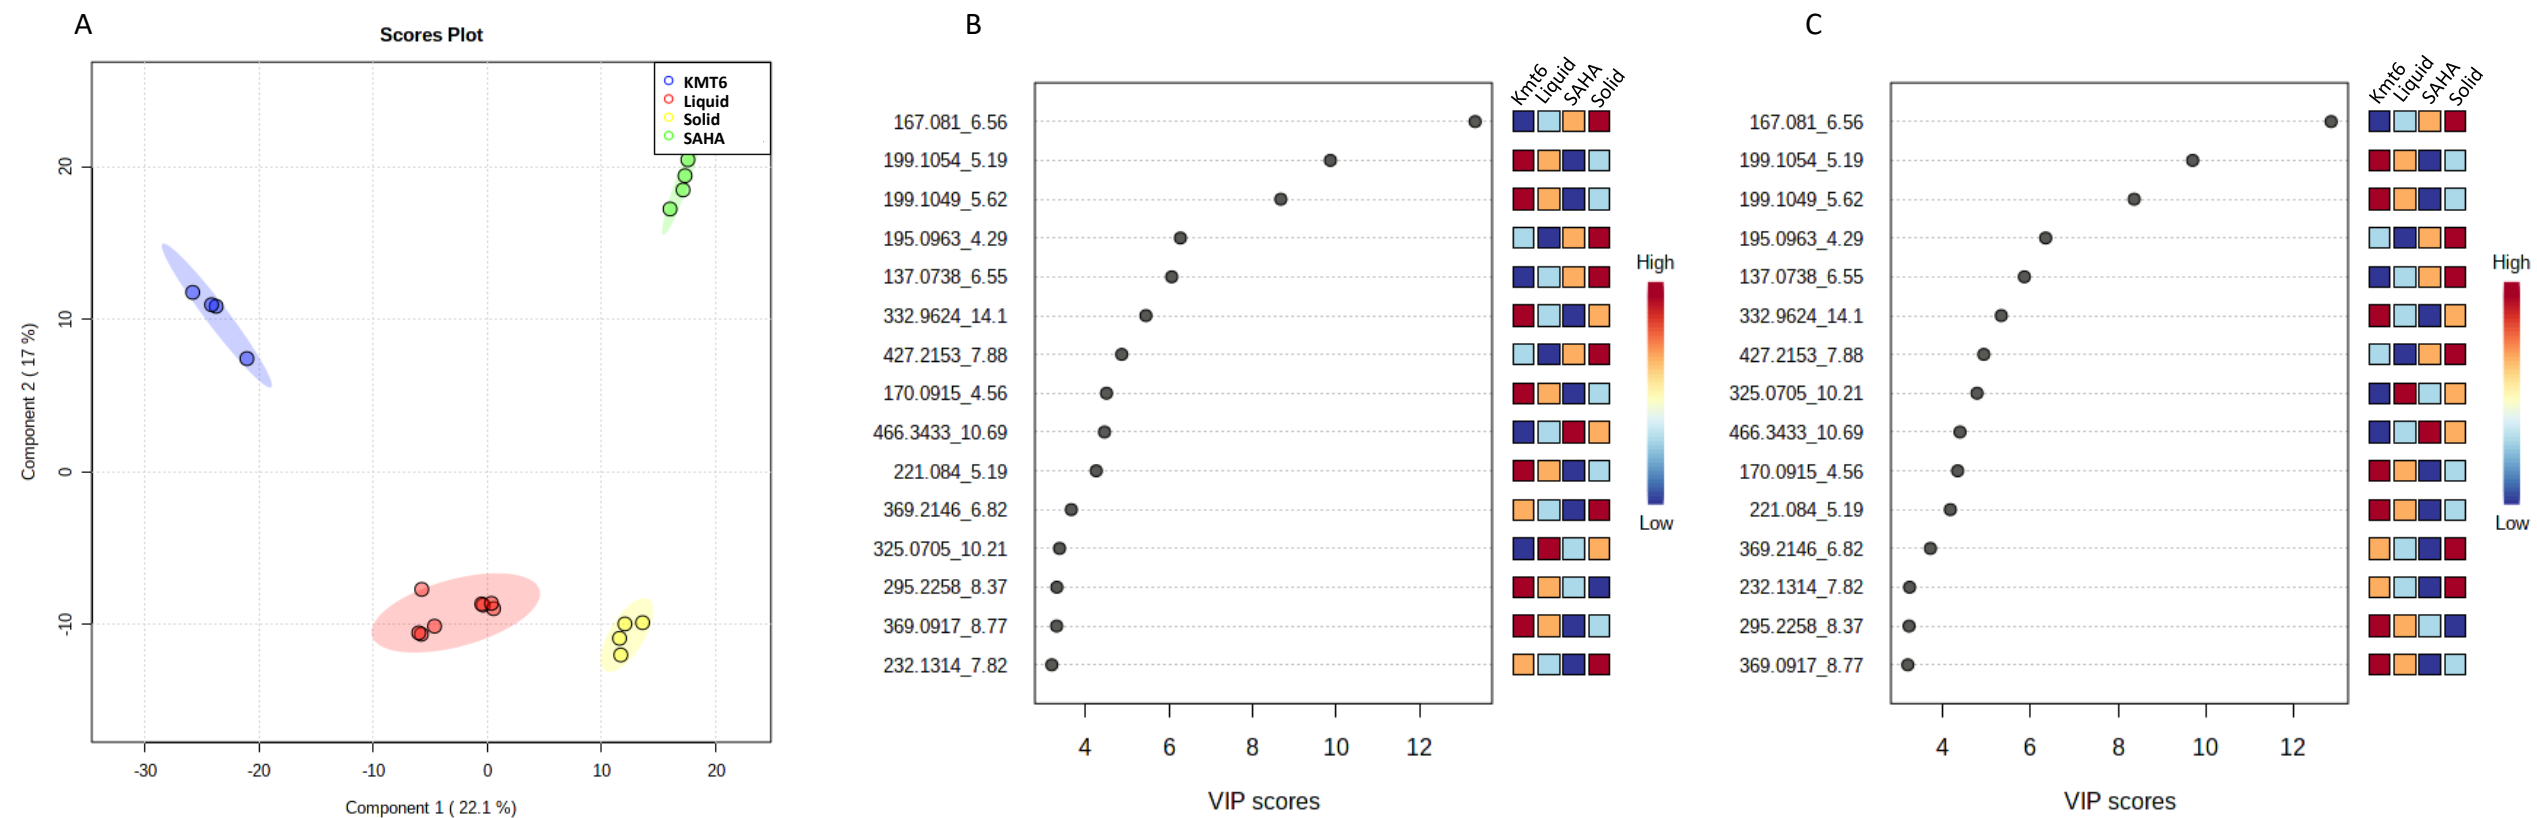

Figure S3. **(A)** Score plot for PLS-DA of the normalised and Pareto-scaled matrix; **(B)** VIP features for component 1 of PLS-DA; **(C)** VIP features for component 2 of PLS-DA.

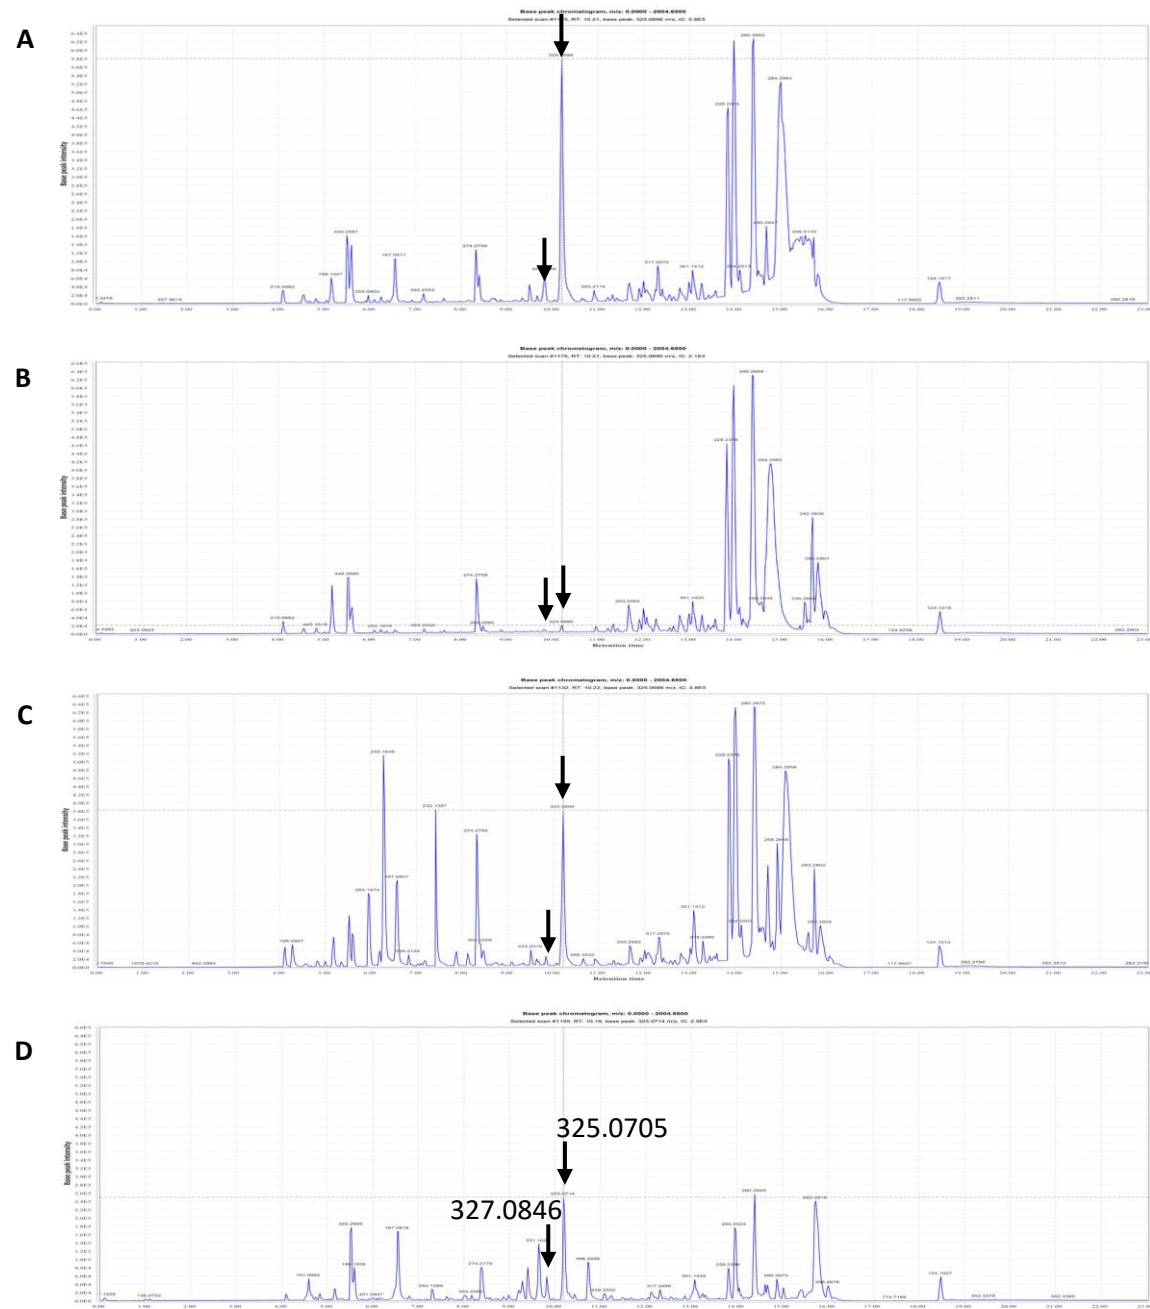

Figure S4. HPLC chromatograms showing the identified compounds sterigmatocystin (ST) ( $t_R = 10.21$  min,  $m/z = 325.0705$ ) and dihydro-sterigmatocystin ( $t_R = 9.84$  min,  $m/z = 327.0846$ ) under different conditions **(A)** M2 liquid medium inoculated with WT; **(B)** M2 liquid medium inoculated with the *Kmt6* mutant strain; **(C)** M2 liquid medium supplemented with 100  $\mu$ M SAHA and inoculated with WT; **(D)** M2 solid medium inoculated with WT.

Table S1

| Opl | Description    |          | Hits in DMP<br>(Ascomycetes) | Hits in NP<br>Atlas<br>(Ascomycetes) | Hits in SciFinder<br>(Purification or<br>"recovery" or<br>"Natural product<br>occurrence") | New compound<br>1: high chance<br>0: low chance | Hits in databases<br>(bold corresponds to compounds already described in Ascomycetes<br>red to compounds already described in Sordariales<br>* to compounds already described in Podospora) | Variation observed (average peak areas) |             |         |          | Statistical analyses |            |
|-----|----------------|----------|------------------------------|--------------------------------------|--------------------------------------------------------------------------------------------|-------------------------------------------------|---------------------------------------------------------------------------------------------------------------------------------------------------------------------------------------------|-----------------------------------------|-------------|---------|----------|----------------------|------------|
|     |                |          |                              |                                      |                                                                                            |                                                 |                                                                                                                                                                                             | WT-Liquid                               | Kat8-Liquid | WT-SABA | WT-Solid | Multivariate         | Univariate |
|     | T <sub>1</sub> | m/z      | Ion species                  | Monoisotopic<br>m mass               |                                                                                            |                                                 |                                                                                                                                                                                             |                                         |             |         |          |                      |            |
| 1   | 4.11           | 215.0984 | [M-H] <sup>+</sup>           | 214.0911                             | 8 (0)                                                                                      | 1 (1)                                           | 0                                                                                                                                                                                           |                                         |             |         |          |                      |            |
| 2   | 4.29           | 195.0963 | [M-H] <sup>+</sup>           | 194.0890                             | 173 (38)                                                                                   | 48 (37)                                         | 0                                                                                                                                                                                           |                                         |             |         |          |                      |            |
| 3   | 4.58           | 170.0915 | [M-H] <sup>+</sup>           | 169.0842                             | 11 (0)                                                                                     | 0                                               | 0                                                                                                                                                                                           |                                         |             |         |          |                      |            |
| 4   | 4.67           | 203.0204 | [M-H] <sup>+</sup>           | 183.032                              | 9 (0)                                                                                      | 0                                               | 1                                                                                                                                                                                           |                                         |             |         |          |                      |            |
| 5   | 5.19           | 199.1054 | [M-H] <sup>+</sup>           | 198.0981                             | 9 (3)                                                                                      | 2 (0)                                           | 0                                                                                                                                                                                           |                                         |             |         |          |                      |            |
| 6   | 5.36           | 243.1143 | [M-Na] <sup>+</sup>          | 220.1280                             | 17 (1)                                                                                     | 1 (1)                                           | 0                                                                                                                                                                                           |                                         |             |         |          |                      |            |
| 7   | 5.55           | 176.0836 | [M-H-O-H] <sup>+</sup>       | 183.0824                             | 0                                                                                          | 0                                               | 19 (0)                                                                                                                                                                                      |                                         |             |         |          |                      |            |
| 8   | 5.61           | 199.1049 | [M-H] <sup>+</sup>           | 198.0976                             | 9 (3)                                                                                      | 2 (0)                                           | 0                                                                                                                                                                                           |                                         |             |         |          |                      |            |
| 9   | 5.97           | 211.1029 | [M-H] <sup>+</sup>           | 210.0956                             | 196 (46)                                                                                   | 49 (33)                                         | 0                                                                                                                                                                                           |                                         |             |         |          |                      |            |
| 10  | 5.98           | 255.0807 | [M-H] <sup>+</sup>           | 254.0808                             | 57 (11)                                                                                    | 15 (11)                                         | 0                                                                                                                                                                                           |                                         |             |         |          |                      |            |
| 11  | 5.98           | 401.0915 | [M-H] <sup>+</sup>           | 400.0842                             | 15 (4)                                                                                     | 5 (4)                                           | 0                                                                                                                                                                                           |                                         |             |         |          |                      |            |
| 12  | 6.56           | 167.0810 | [M-H] <sup>+</sup>           | 166.0737                             | 25 (2)                                                                                     | 0                                               | 0                                                                                                                                                                                           |                                         |             |         |          |                      |            |
| 13  | 6.61           | 263.1763 | [M-H] <sup>+</sup>           | 262.1720                             | 35 (0)                                                                                     | 2 (0)                                           | 68208 (72)                                                                                                                                                                                  | 1                                       |             |         |          |                      |            |
| 14  | 6.64           | 424.1998 | [M-H] <sup>+</sup>           | 423.1912                             | 7 (0)                                                                                      | 0                                               | 8113 (32)                                                                                                                                                                                   | 1                                       |             |         |          |                      |            |
| 15  | 6.71           | 461.1803 | [M-H] <sup>+</sup>           | 460.172                              | 39 (2)                                                                                     | 2 (2)                                           | 0                                                                                                                                                                                           |                                         |             |         |          |                      |            |
| 16  | 6.74           | 222.1537 | [M-H] <sup>+</sup>           | 221.1464                             | 37 (0)                                                                                     | 2 (0)                                           | 98258 (106)                                                                                                                                                                                 | 1                                       |             |         |          |                      |            |
| 17  | 6.81           | 231.0633 | [M-Na] <sup>+</sup>          | 208.0741                             | 186 (48)                                                                                   | 46 (33)                                         | 0                                                                                                                                                                                           |                                         |             |         |          |                      |            |
| 18  | 6.81           | 209.0903 | [M-H] <sup>+</sup>           | 208.083                              | 20 (1)                                                                                     | 2 (0)                                           | 0                                                                                                                                                                                           |                                         |             |         |          |                      |            |
| 19  | 6.82           | 369.2146 | [M-H] <sup>+</sup>           | 368.2073                             | 43 (3)                                                                                     | 2 (2)                                           | 0                                                                                                                                                                                           |                                         |             |         |          |                      |            |
|     |                |          | [M-Na] <sup>+</sup>          | 346.2254                             | 7 (0)                                                                                      | 1 (0)                                           |                                                                                                                                                                                             |                                         |             |         |          |                      |            |
|     |                |          | [M-H-O-H] <sup>+</sup>       | 386.2168                             | 6 (0)                                                                                      | 1 (0)                                           |                                                                                                                                                                                             |                                         |             |         |          |                      |            |
| 20  | 6.92           | 248.1328 | [M-H] <sup>+</sup>           | 247.1255                             | 12 (1)                                                                                     | 1 (1)                                           | 0                                                                                                                                                                                           |                                         |             |         |          |                      |            |
| 21  | 7.11           | 426.2193 | [M-H] <sup>+</sup>           | 425.2202                             | 3 (2)                                                                                      | 2 (1)                                           | 0                                                                                                                                                                                           |                                         |             |         |          |                      |            |
| 22  | 7.17           | 355.2532 | [M-H] <sup>+</sup>           | 354.2479                             | 1 (0)                                                                                      | 0                                               | 9990 (3)                                                                                                                                                                                    | 1                                       |             |         |          |                      |            |
|     |                |          | [M-Na] <sup>+</sup>          | 337.2214                             | 3 (1)                                                                                      | 0                                               | 1913 (3)                                                                                                                                                                                    |                                         |             |         |          |                      |            |
|     |                |          | [M-H-O-H] <sup>+</sup>       | 332.2660                             | 39 (0)                                                                                     | 0                                               | 1722 (55)                                                                                                                                                                                   |                                         |             |         |          |                      |            |
| 23  | 7.20           | 490.2253 | [M-Na] <sup>+</sup>          | 467.2161                             | 1 (0)                                                                                      | 0                                               | 8772 (19)                                                                                                                                                                                   | 1                                       |             |         |          |                      |            |
| 24  | 7.28           | 252.1272 | [M-H] <sup>+</sup>           | 251.1157                             | 42 (6)                                                                                     | 14 (10)                                         | 0                                                                                                                                                                                           |                                         |             |         |          |                      |            |
| 25  | 7.41           | 395.1905 | [M-H] <sup>+</sup>           | 394.1832                             | 40 (1)                                                                                     | 3 (3)                                           | 0                                                                                                                                                                                           |                                         |             |         |          |                      |            |
| 26  | 7.41           | 252.0910 | [M-H] <sup>+</sup>           | 251.0837                             | 15 (2)                                                                                     | 5 (4)                                           | 0                                                                                                                                                                                           |                                         |             |         |          |                      |            |
| 27  | 7.71           | 351.2497 | [M-H-O-H] <sup>+</sup>       | 368.2509                             | 70 (2)                                                                                     | 6 (0)                                           | 0                                                                                                                                                                                           |                                         |             |         |          |                      |            |
|     |                |          | [M-H] <sup>+</sup>           | 426.2080                             | 71 (18)                                                                                    | 12 (12)                                         | 0                                                                                                                                                                                           |                                         |             |         |          |                      |            |
| 29  | 8.14           | 427.2141 | [M-H] <sup>+</sup>           | 426.2080                             | 71 (18)                                                                                    | 12 (12)                                         | 0                                                                                                                                                                                           |                                         |             |         |          |                      |            |
| 30  | 8.27           | 371.1062 | [M-H] <sup>+</sup>           | 370.0989                             | 158 (12)                                                                                   | 16 (9)                                          | 0                                                                                                                                                                                           |                                         |             |         |          |                      |            |
|     |                |          | [M-Na] <sup>+</sup>          | 348.1170                             | 299 (13)                                                                                   | 21 (13)                                         | 0                                                                                                                                                                                           |                                         |             |         |          |                      |            |
|     |                |          | [M-H-O-H] <sup>+</sup>       | 388.1084                             | 0                                                                                          | 0                                               |                                                                                                                                                                                             |                                         |             |         |          |                      |            |
| 31  | 8.36           | 253.1378 | [M-H] <sup>+</sup>           | 252.1305                             | 130 (32)                                                                                   | 41 (22)                                         | 0                                                                                                                                                                                           |                                         |             |         |          |                      |            |
|     |                |          | [M-Na] <sup>+</sup>          | 230.1486                             | 70 (13)                                                                                    | 21 (9)                                          | 0                                                                                                                                                                                           |                                         |             |         |          |                      |            |
|     |                |          | [M-H-O-H] <sup>+</sup>       | 270.1400                             | 47 (16)                                                                                    | 19 (13)                                         | 0                                                                                                                                                                                           |                                         |             |         |          |                      |            |
| 32  | 8.36           | 213.1568 | [M-H] <sup>+</sup>           | 212.1495                             | 10 (2)                                                                                     | 3 (1)                                           | 0                                                                                                                                                                                           |                                         |             |         |          |                      |            |
| 33  | 8.36           | 699.4177 | [2M-H] <sup>+</sup>          | 349.2052                             | 8 (1)                                                                                      | 2 (1)                                           | 0                                                                                                                                                                                           |                                         |             |         |          |                      |            |
| 34  | 8.36           | 353.2283 | [M-Na] <sup>+</sup>          | 330.2391                             | 45 (4)                                                                                     | 3 (3)                                           | 0                                                                                                                                                                                           |                                         |             |         |          |                      |            |
| 35  | 8.47           | 477.2637 | [M-H] <sup>+</sup>           | 476.2564                             | 33 (0)                                                                                     | 2 (1)                                           | 0                                                                                                                                                                                           |                                         |             |         |          |                      |            |
|     |                |          | [M-Na] <sup>+</sup>          | 454.2745                             | 120 (0)                                                                                    | 5 (1)                                           | 0                                                                                                                                                                                           |                                         |             |         |          |                      |            |
|     |                |          | [M-H-O-H] <sup>+</sup>       | 494.2659                             | 63 (1)                                                                                     | 4 (0)                                           | 0                                                                                                                                                                                           |                                         |             |         |          |                      |            |
| 36  | 8.62           | 700.3266 | [M-H] <sup>+</sup>           | 699.3293                             | 4 (0)                                                                                      | 0                                               | 383 (6)                                                                                                                                                                                     | 1                                       |             |         |          |                      |            |
| 37  | 8.66           | 469.164  | [M-H] <sup>+</sup>           | 468.1566                             | 5 (0)                                                                                      | 0                                               | 1306 (7)                                                                                                                                                                                    | 1                                       |             |         |          |                      |            |
|     |                |          | [M-Na] <sup>+</sup>          | 446.1748                             | 7 (1)                                                                                      | 1 (1)                                           | 2555 (18)                                                                                                                                                                                   |                                         |             |         |          |                      |            |
|     |                |          | [M-H-O-H] <sup>+</sup>       | 486.1662                             | 18 (0)                                                                                     | 1 (0)                                           | 1996 (31)                                                                                                                                                                                   |                                         |             |         |          |                      |            |
| 38  | 9.28           | 286.1432 | [M-H] <sup>+</sup>           | 285.1359                             | 59 (1)                                                                                     | 4 (2)                                           | 0                                                                                                                                                                                           |                                         |             |         |          |                      |            |
|     |                |          | [M-Na] <sup>+</sup>          | 263.1540                             | 22 (1)                                                                                     | 5 (3)                                           | 0                                                                                                                                                                                           |                                         |             |         |          |                      |            |
|     |                |          | [M-H-O-H] <sup>+</sup>       | 303.1454                             | 46 (2)                                                                                     | 4 (2)                                           | 0                                                                                                                                                                                           |                                         |             |         |          |                      |            |
| 39  | 9.37           | 318.2981 | [M-H] <sup>+</sup>           | 317.2908                             | 18 (0)                                                                                     | 1 (0)                                           | 97 (4)                                                                                                                                                                                      | 1                                       |             |         |          |                      |            |
| 40  | 9.5            | 333.2032 | [M-H] <sup>+</sup>           | 332.1959                             | 1053 (24)                                                                                  | 40 (18)                                         | 0                                                                                                                                                                                           |                                         |             |         |          |                      |            |
| 41  | 9.84           | 327.0846 | [M-H] <sup>+</sup>           | 326.0773                             | 98 (6)                                                                                     | 8 (4)                                           | 0                                                                                                                                                                                           |                                         |             |         |          |                      |            |
| 42  | 10.17          | 165.9889 | [M-H] <sup>+</sup>           | 164.9816                             | 0                                                                                          | 0                                               | 3 (0)                                                                                                                                                                                       | 1                                       |             |         |          |                      |            |
| 43  | 10.20          | 325.0705 | [M-H] <sup>+</sup>           | 324.0632                             | 29 (7)                                                                                     | 9 (3)                                           | 0                                                                                                                                                                                           |                                         |             |         |          |                      |            |
| 44  | 10.20          | 464.3257 | [M-H] <sup>+</sup>           | 463.3184                             | 0                                                                                          | 0                                               | 717 (5)                                                                                                                                                                                     | 1                                       |             |         |          |                      |            |
|     |                |          | [M-Na] <sup>+</sup>          | 441.3365                             | 1 (0)                                                                                      | 0                                               | 412 (2)                                                                                                                                                                                     |                                         |             |         |          |                      |            |
|     |                |          | [M-H-O-H] <sup>+</sup>       | 481.3279                             | 0                                                                                          | 0                                               | 100 (0)                                                                                                                                                                                     |                                         |             |         |          |                      |            |
| 45  | 10.43          | 464.3287 | [M-H] <sup>+</sup>           | 463.3214                             | 0                                                                                          | 0                                               | 717 (5)                                                                                                                                                                                     | 1                                       |             |         |          |                      |            |
|     |                |          | [M-Na] <sup>+</sup>          | 441.3398                             | 1 (0)                                                                                      | 0                                               | 412 (2)                                                                                                                                                                                     |                                         |             |         |          |                      |            |
|     |                |          | [M-H-O-H] <sup>+</sup>       | 481.3312                             | 0                                                                                          | 0                                               | 100 (0)                                                                                                                                                                                     |                                         |             |         |          |                      |            |
| 46  | 10.69          | 466.3433 | [M-H] <sup>+</sup>           | 465.3360                             | 4 (0)                                                                                      | 3 (0)                                           | 440 (40)                                                                                                                                                                                    | 1                                       |             |         |          |                      |            |
|     |                |          | [M-Na] <sup>+</sup>          | 443.3541                             | 0                                                                                          | 0                                               | 240 (2)                                                                                                                                                                                     |                                         |             |         |          |                      |            |
|     |                |          | [M-H-O-H] <sup>+</sup>       | 483.3455                             | 1 (0)                                                                                      | 0                                               | 343 (0)                                                                                                                                                                                     |                                         |             |         |          |                      |            |
| 47  | 10.93          | 263.2106 | [M-H-O-H] <sup>+</sup>       | 310.2128                             | 7 (4)                                                                                      | 15 (2)                                          | 0                                                                                                                                                                                           |                                         |             |         |          |                      |            |
| 48  | 11.09          | 671.4617 | [M-H] <sup>+</sup>           | 670.4544                             | 0                                                                                          | 0                                               | 179 (1)                                                                                                                                                                                     | 1                                       |             |         |          |                      |            |
| 49  | 11.22          | 739.4787 | [M-Na] <sup>+</sup>          | 716.4894                             | 4 (0)                                                                                      | 3 (0)                                           | 145 (4)                                                                                                                                                                                     | 1                                       |             |         |          |                      |            |
| 50  | 11.24          | 563.3802 | [M-H] <sup>+</sup>           | 562.3729                             | 10 (0)                                                                                     | 0                                               | 540 (12)                                                                                                                                                                                    | 1                                       |             |         |          |                      |            |
| 51  | 11.97          | 405.2612 | [M-H] <sup>+</sup>           | 404.2540                             | 72 (4)                                                                                     | 10 (5)                                          | 0                                                                                                                                                                                           |                                         |             |         |          |                      |            |
| 52  | 12.33          | 179.1526 | [M-H] <sup>+</sup>           | 178.1453                             | 8 (0)                                                                                      | 4 (0)                                           | 8677 (28)                                                                                                                                                                                   | 1                                       |             |         |          |                      |            |
|     |                |          | [M-H-O-H] <sup>+</sup>       | 196.1548                             | 2 (0)                                                                                      | 0                                               | 37868 (42)                                                                                                                                                                                  |                                         |             |         |          |                      |            |
| 53  | 12.49          | 480.2132 | [M-H] <sup>+</sup>           | 479.2059                             | 3 (2)                                                                                      | 2 (2)                                           | 0                                                                                                                                                                                           |                                         |             |         |          |                      |            |
| 54  | 13.34          | 329.1648 | [M-Na] <sup>+</sup>          | 306.1841                             | 72 (9)                                                                                     | 18 (12)                                         | 0                                                                                                                                                                                           |                                         |             |         |          |                      |            |
| 55  | 14.1           | 332.9624 | [M-H] <sup>+</sup>           | 331.9551                             | 0                                                                                          | 0                                               | 41 (1)                                                                                                                                                                                      | 1                                       |             |         |          |                      |            |
| 56  | 15.44          | 430.3198 | [M-H] <sup>+</sup>           | 429.3125                             | 0                                                                                          | 0                                               | 1142 (1)                                                                                                                                                                                    | 1                                       |             |         |          |                      |            |
|     |                |          | [M-Na] <sup>+</sup>          | 407.3308                             | 0                                                                                          | 0                                               | 360 (0)                                                                                                                                                                                     |                                         |             |         |          |                      |            |
|     |                |          | [M-H-O-H] <sup>+</sup>       | 447.3220                             | 2 (0)                                                                                      | 0                                               | 385 (3)                                                                                                                                                                                     |                                         |             |         |          |                      |            |
| 57  | 15.44          | 422.1906 | [M-H] <sup>+</sup>           | 421.1833                             | 12 (1)                                                                                     | 1 (1)                                           | 0                                                                                                                                                                                           |                                         |             |         |          |                      |            |
|     |                |          | [M-Na] <sup>+</sup>          | 399.2014                             | 12 (2)                                                                                     | 3 (3)                                           | 0                                                                                                                                                                                           |                                         |             |         |          |                      |            |
|     |                |          | [M-H-O-H] <sup>+</sup>       | 439.1928                             | 3 (0)                                                                                      | 0                                               | 0                                                                                                                                                                                           |                                         |             |         |          |                      |            |
